# Supplementary material
Source: Springer Nature journal article supplement (https://www.springermedizin.de/resource/supplementary/12872_2013_697_MOESM2_ESM.pdf/9430692)

# TGF- $\beta$ serum levels

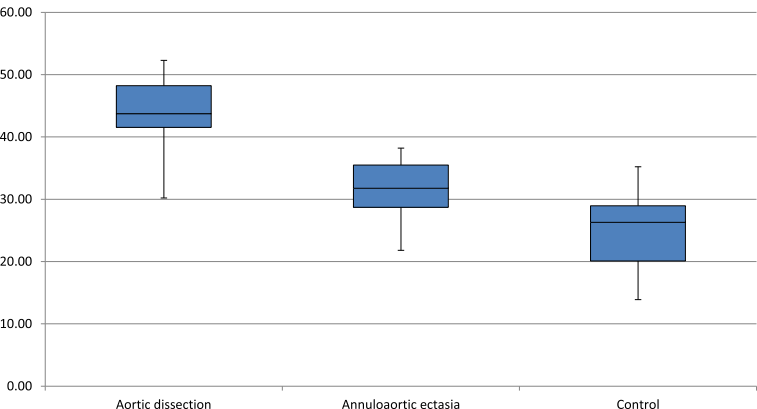

Supplement: MOESM2 [file 9430692]
